# Supplementary material
Source: PubMed Central journal article supplement (PMC4930710)
Supplement: NIHMS757963-supplement-6.pdf [file NIHMS757963-supplement-6.pdf]

**Supplementary Table 1** Pharmacokinetic parameters<sup>a</sup> of veliparib and its main metabolite (A-925088) when veliparib was given orally alone on cycle 2 day -1 or in combination with irinotecan on cycle 2 day 8

| Dose (mg) | n | Day | T <sub>max</sub> (h) | C <sub>max</sub> (ng/ml) | T <sub>last</sub> (h) | C <sub>last</sub> (ng/ml) | AUC <sub>last</sub> (ng/ml*h) | AUC <sub>0-∞</sub> (ng/ml*h) | T <sub>1/2</sub> (h) | CL/F <sup>b</sup> (L) | A-925088 AUC <sub>last</sub> (ng/ml*h) | AUC ratio A-925088 /veliparib |
|-----------|---|-----|----------------------|--------------------------|-----------------------|---------------------------|-------------------------------|------------------------------|----------------------|-----------------------|----------------------------------------|-------------------------------|
| 10        | 6 | -1  | 2.1±1.2<br>(83%)     | 32±18<br>(55%)           | 9.6±0.6<br>(7%)       | 9±4<br>(42%)              | 154±51<br>(33%)               | 222±63<br>(28%)              | 5.0±1.8<br>(35%)     | 48±13<br>(27%)        | 140±97<br>(69%)                        | 1.0±1.0<br>(97%)              |
| 10        | 6 | 8   | 2.5±1.4<br>(55%)     | 50±20<br>(40%)           | 7.9±2.7<br>(34%)      | 23±6<br>(26%)             | 259±96<br>(37%)               |                              |                      | 45±23<br>(52%)        | 100±69<br>(69%)                        | 0.8±0.5<br>(70%)              |
| 20        | 7 | -1  | 2.4±1.9<br>(77%)     | 170±62<br>(36%)          | 24.4±6.7<br>(27%)     | 13±18<br>(145%)           | 1101±307<br>(28%)             | 1236±332<br>(27%)            | 6.1±1.1<br>(17%)     | 17±4<br>(22%)         | 213±93<br>(44%)                        | 0.2±0.1<br>(49%)              |
| 20        | 7 | 8   | 2.4±1.3<br>(55%)     | 244±101<br>(41%)         | 9.3±0.9<br>(10%)      | 94±34<br>(36%)            | 1349±402<br>(30%)             |                              |                      | 16±4<br>(25%)         | 226±25<br>(55%)                        | 0.2±0.1<br>(77%)              |
| 40        | 8 | -1  | 1.9±1.2<br>(60%)     | 366±145<br>(40%)         | 24.3±6.1<br>(25%)     | 31±37<br>(117%)           | 2558±752<br>(29%)             | 3067±1280<br>(42%)           | 7.7±5.3<br>(68%)     | 14±4<br>(25%)         | 380±109<br>(29%)                       | 0.2±0.0<br>(19%)              |
| 40        | 8 | 8   | 2.1±1.1<br>(53%)     | 576±103<br>(18%)         | 9.7±0.6<br>(6%)       | 187±58<br>(31%)           | 3252±551<br>(17%)             |                              |                      | 13±2<br>(17%)         | 471±275<br>(58%)                       | 0.2±0.1<br>(46%)              |
| 50        | 5 | -1  | 1.0±0.3<br>(34%)     | 842±250<br>(30%)         | 27.8±1.9<br>(7%)      | 28±40<br>(144%)           | 4245±784<br>(42%)             | 4611±2369<br>(51%)           | 6.6±2.2<br>(33%)     | 13±5<br>(41%)         | 763±205<br>(27%)                       | 0.2±0.0<br>(12%)              |
| 50        | 4 | 8   | 2.8±0.9<br>(31%)     | 760±124<br>(16%)         | 9.7±0.5<br>(5%)       | 199±41<br>(20%)           | 4636±692<br>(15%)             |                              |                      | 10±2<br>(21%)         | 578±391<br>(68%)                       | 0.2±0.0<br>(3%)               |

<sup>a</sup> Pharmacokinetic parameters were estimated using non-compartmental analysis with WinNonlin (Pharsight). Data are expressed as the mean ± standard deviation with coefficient variation in the parenthesis.

<sup>b</sup> CL/F on day 8 was calculated as dose/AUC<sub>last</sub>.

Abbreviations: C<sub>max</sub>, maximum plasma concentration; T<sub>max</sub>, time to achieve C<sub>max</sub>; T<sub>last</sub>, last sampling time point; C<sub>last</sub>, last measurable concentration; AUC<sub>last</sub>, area under the plasma concentration time curve from time 0 to the last sampling time point; AUC<sub>0-∞</sub>, area under the plasma concentration time curve from time 0 to infinity; T<sub>1/2</sub>, terminal elimination half-life; CL/F, apparent oral clearance.
