# Supplementary material
Source: PubMed Central journal article supplement (PMC4930710)
Supplement: NIHMS757963-supplement-7.pdf [file NIHMS757963-supplement-7.pdf]

**Supplementary Table 2** Pharmacokinetic parameters<sup>a</sup> of irinotecan and its main active metabolite SN-38 when irinotecan was administered as a 1.5-h intravenous infusion (100 mg/m<sup>2</sup>) alone on cycle 1 day 1 or in combination with veliparib on cycle 2 day 8

|            | Cycle/day | n  | T <sub>max</sub> (h) | C <sub>max</sub> (ng/ml) | AUC <sub>last</sub> (ng/ml*h) | AUC <sub>0-∞</sub> (ng/ml*h) | T <sub>1/2</sub> (h) | CL (L/h/m <sup>2</sup> ) | V <sub>ss</sub> (L/m <sup>2</sup> ) |
|------------|-----------|----|----------------------|--------------------------|-------------------------------|------------------------------|----------------------|--------------------------|-------------------------------------|
| Irinotecan |           |    |                      |                          |                               |                              |                      |                          |                                     |
|            | 1/1       | 34 | 1.5±0.2<br>(12%)     | 1079±344<br>(32%)        | 5205±1783<br>(34%)            | 5282±1831<br>(35%)           | 7.7±1.1<br>(15%)     | 20±5<br>(25%)            | 150±37<br>(25%)                     |
|            | 2/8       | 23 | 1.5±0.2<br>(14%)     | 823±246<br>(30%)         | 4091±1072<br>(26%)            | 4155±1093<br>(26%)           | 7.6±1.0<br>(14%)     | 25±7<br>(26%)            | 182±59<br>(33%)                     |
| SN-38      |           |    |                      |                          |                               |                              |                      |                          |                                     |
|            | 1/1       | 34 | 2.0±0.9<br>(47%)     | 11±5<br>(48%)            | 90±49<br>(54%)                | 112±61<br>(54%)              | 13.0±10.6<br>(82%)   |                          |                                     |
|            | 2/8       | 23 | 1.9±1.0<br>(53%)     | 10±4<br>(41%)            | 68±33<br>(49%)                | 92±56<br>(61%)               | 12.6±12.1<br>(96%)   |                          |                                     |

<sup>a</sup> Pharmacokinetic parameters were estimated using non-compartmental analysis with WinNonlin (Pharsight). Data are expressed as the mean ± standard deviation with coefficient variation in the parenthesis.

Abbreviations: C<sub>max</sub>, maximum plasma concentration; T<sub>max</sub>, time to achieve C<sub>max</sub>; AUC<sub>last</sub>, area under the plasma concentration time curve from time 0 to the last sampling time point; AUC<sub>0-∞</sub>, area under the plasma concentration time curve from time 0 to infinity; T<sub>1/2</sub>, terminal elimination half-life; CL, clearance; V<sub>ss</sub>, volume of distribution at steady-state.
