# Supplementary material
Source: PubMed Central journal article supplement (PMC4930710)

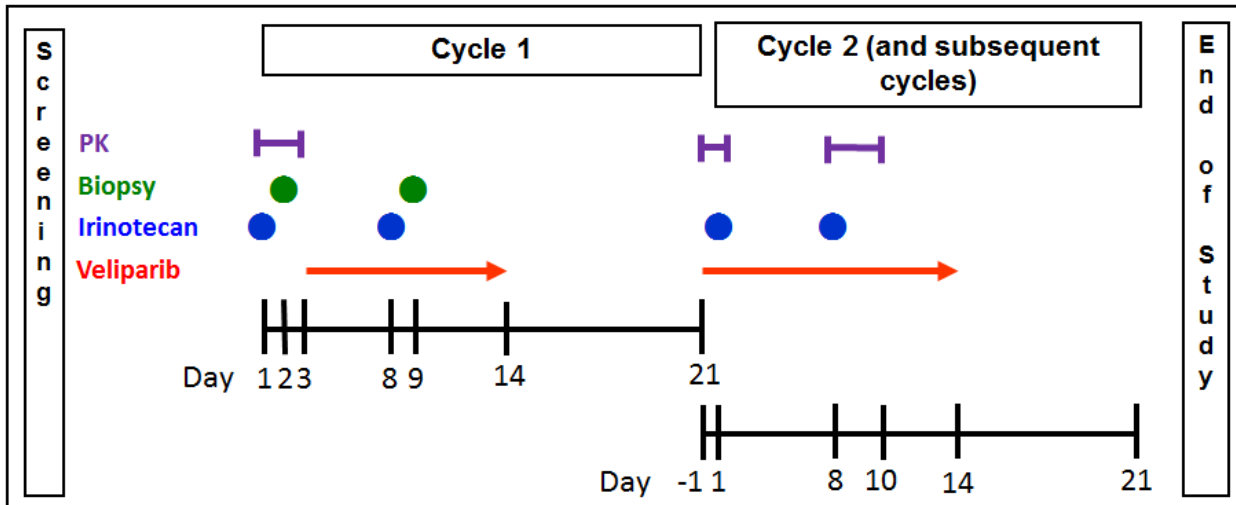

Supplement: NIHMS757963-supplement-2.pdf [file NIHMS757963-supplement-2.pdf]

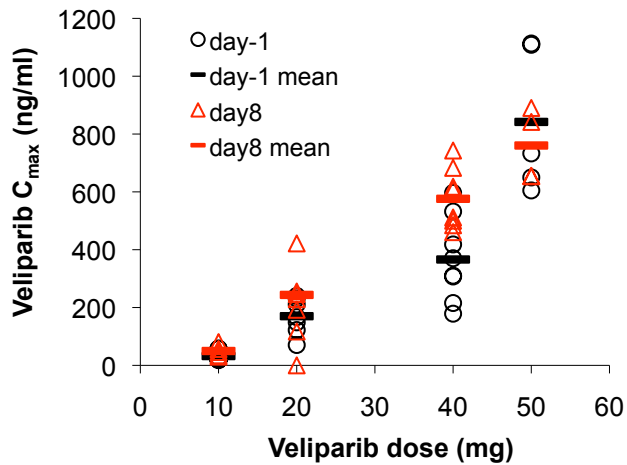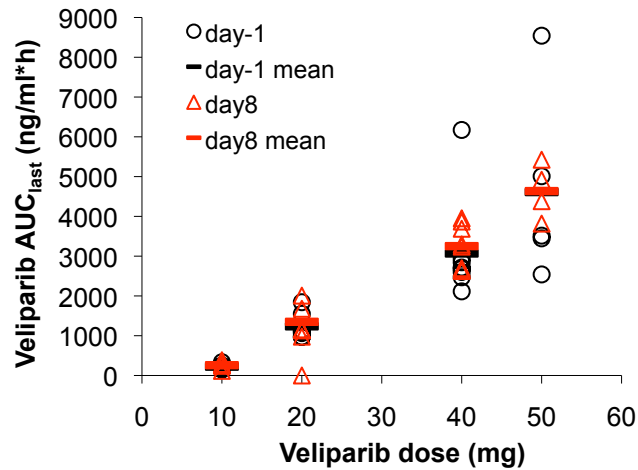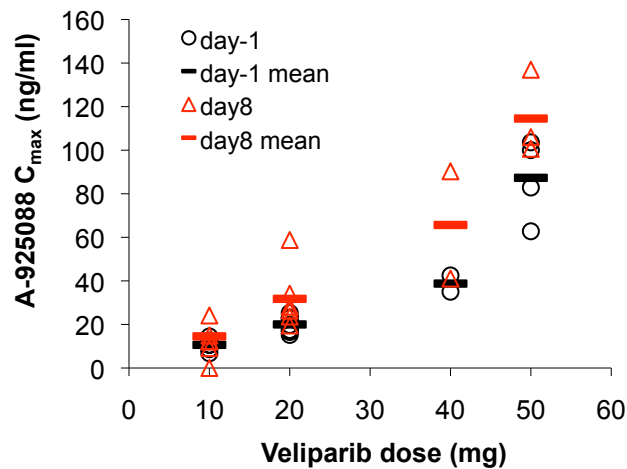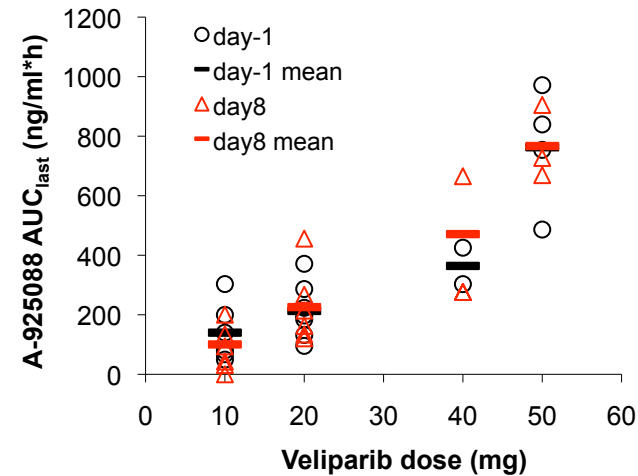

Supplement: NIHMS757963-supplement-3.pdf [file NIHMS757963-supplement-3.pdf]
